# Supplementary material for: Cooperativity of Stress-Responsive Transcription Factors in Core Hypoxia-Inducible Factor Binding Regions
Source: PubMed Central journal article supplement (PMC3454324; doi:10.1371/journal.pone.0045708), 2012-09-24
Supplement: pone.0045708.s001.pdf [file pone.0045708.s001.pdf]

**A**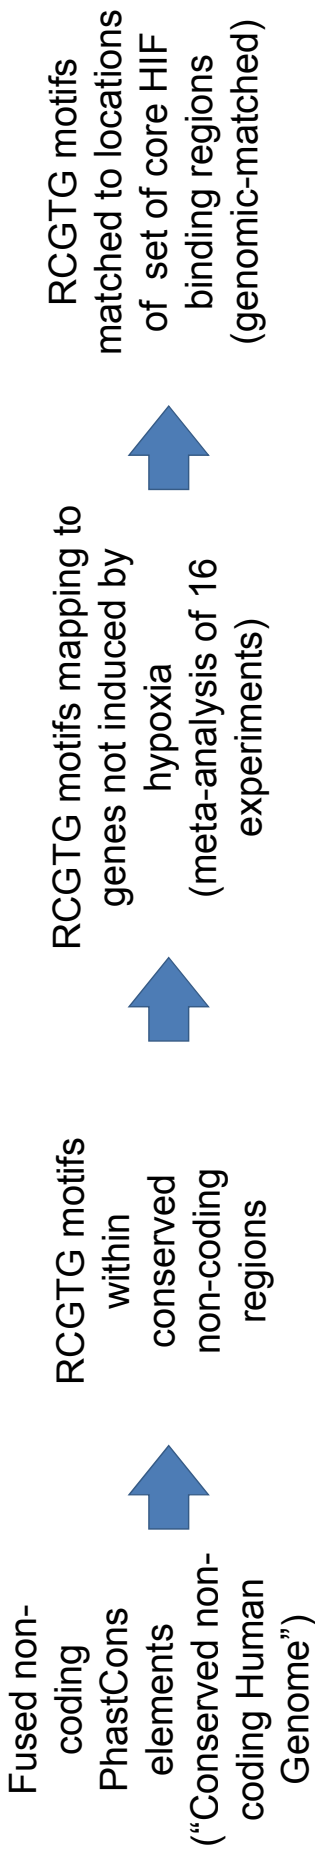**B** Core HIF binding regions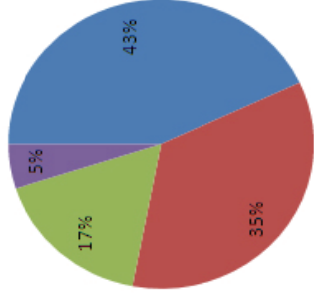**C** Background control regions (unmatched)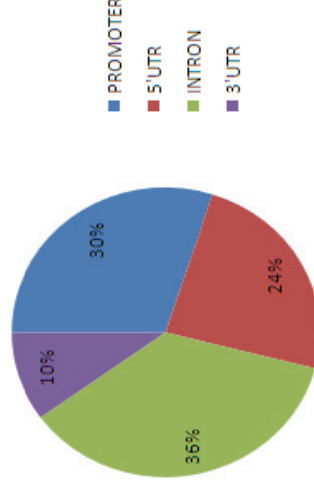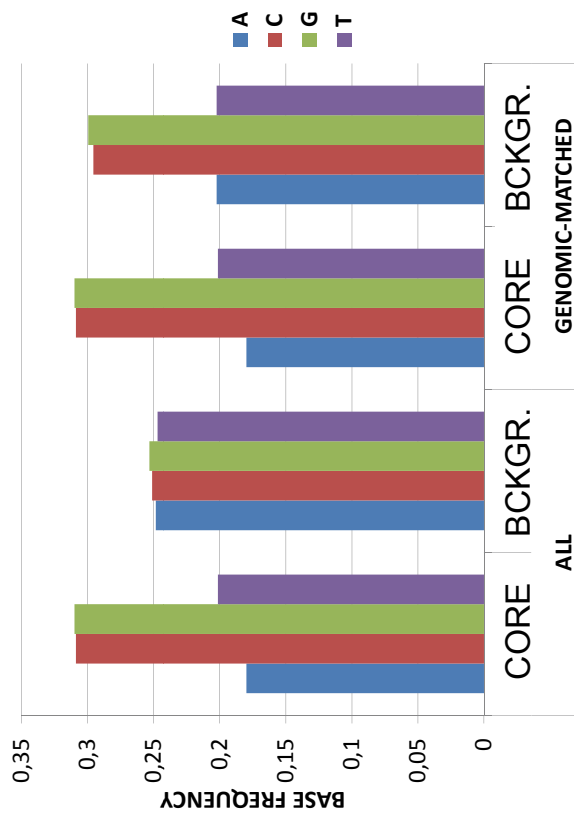

**Figure S1: Construction of a background set of control sequences resembling core HIF binding regions. (A)** Stepwise schema of the employed strategy **(B)** Pie charts of genomic location distributions relative to the TSS showing significant differences between selected core HIF binding regions and unmatched background controls **(C)** Nucleotide frequencies of core and background (BCKGR.) sets before and after genomic-matching of control sequences.
